# Supplementary material
Source: PubMed Central journal article supplement (PMC3791755)
Supplement: 1305980110_pnas.201305980SI.pdf [file 1305980110_pnas.201305980SI.pdf]

# Supporting Information

Lande-Diner et al. 10.1073/pnas.1305980110

## SI Text

Because of the complex history of nomenclature regarding Mediator subunits and differences in protein names between mammals and *Drosophila*, it is sometimes thought that mammalian TRAP150 (thyroid hormone receptor-associated protein-150, also known as

THRAP3) is the same protein as Mediator subunit 23 (MED23). It should be noted that TRAP150 and MED23 are unrelated proteins encoded by different genes (mouse *Trap150/Thrap3* gene ID: 230753 on chr4; *Med23* gene ID: 70208 on chr10) and that TRAP150 is not considered a structural component of mediator (1).

1. Taatjes DJ (2010) The human Mediator complex: A versatile, genome-wide regulator of transcription. *Trends Biochem Sci* 35(6):315–322.

```
gtgacttaacatctgtaagctcagcagtcgatgaatgaggctgagacgaaa
aggctgccttgagtttaggggacggcctgtgctacccggtgatttccagg
acagcttggcatacaacgggagattctgttctaaaaatataagttacaa
aaaaaaaaaaaaaaaaaaaaaaaaaaaaaaaaaaaaaaaaaaaaaaaaaaaa
gggtttcactttccaggacatttgggttccacaggtactaataacttctc
ctgggcccattgttcttaaaaaacttctctgggccaagtttgaggccagcc
tgctctacctagagatatttcagataaccgagaaacctgtctagaatcccc
gctccccatgaaaaaaaaactccccaaactaaaaacctcttgggctctatt
gccattaaatgggacaggaggtggctgtaggagagaccgagatccaacgg
acttctgggtccccctgagatcacactatcaaaaactcttctccatttt
gggttgcgttttctgggttccgggtgatcaagtgcccttcttcttgcggg
acctcccaacaactctgtgaggtacaaatatagacctcactttatacaa
cgatctgttcaaggtcagaaagcaggggaagggttaaggcacagaacgaat
gccaagagccctgatggccacaaactagagacttccggggacgtaagc
agaagacgagtggtggggctcgggccctccctcagtcctcccgagagggc
ctctccaaaatggtggggcagtgccgtcagcaacgcccgggccccttcc
gtccacctccctccctcttctcaggccacccagggggagcggggggag
gggggaaacggagggcgaacgcagtcgcccaagtgaccgccgatctcggg
cgcgtagcgaagcggcgggcccacgcctcgcctctgcctgtgggaaat
agagttcgagaggacgtccggtgagtcaggagagagaaaacctaggactac
ATTTCCAGGAGGTAGCGGAGCGAGGCGGTAGCCGCCGTCGTCCGAGAGC
GGGGACGCGGGGCGCGCTAGCGGGCGGGGCGAGCTTCGGGCCGGTTGTG
CCGTTGCGAGATTGCAGCTGTAGTCGCTCCGGCCGGTCAAGGTGTAAC
CTTCCAAG
```

Range = chr4: 125863816 -125864974

*Thrap3* (*Trap150*) gene, promoter and 5' UTR

**Fig. S1.** Promoter region of *Trap150* gene (*Thrap3*) includes circadian locomotor output cycles kaput (CLOCK)-brain, muscle Arnt-like 1 (BMAL1) circadian clock regulatory sites. Shown are 1,000 nucleotides immediately upstream of the putative transcriptional start site (transcribed sequences shown in capital letters) and 158 nucleotides of the 5' UTR. Canonical (shaded) and noncanonical (bold) E-box elements are highlighted.



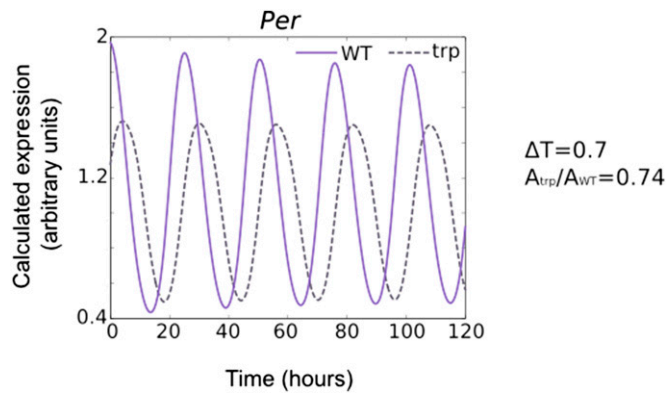

**Fig. S4.** Modeling of clock properties after simulated decrease in *Per* and Cryptochrome (*Cry*) transcription comparable to that observed following depletion of TRAP150 (Fig. 3B). A model of the core mammalian circadian clock (1) was implemented using Matlab R2010a (Mathworks), with a solver for nonstiff systems (ODE45) that implements a Runge–Kutta method. We used a relative and absolute tolerance of  $10^{(-9)}$ . The plots represent the last 120 h of a 2,000-h simulation, changing parameters that affect transcription rate of *Per* (40% reduction) and *Cry* (25% reduction). WT, computed wild-type trace; trp, computed trace after TRAP150 depletion;  $\Delta T$ , increase in calculated period length in trp trace; A, amplitude.

1. Relógio A, et al. (2011) Tuning the mammalian circadian clock: Robust synergy of two loops. *PLOS Comput Biol* 7(12):e1002309.

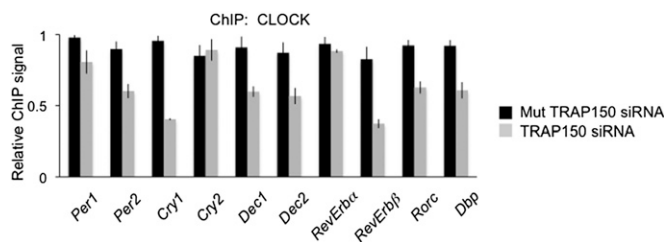

**Fig. S5.** TRAP150 promotes binding of CLOCK-BMAL1 to E-boxes of CLOCK-BMAL1 circadian target genes. ChIP assays showing the effect of TRAP150 depletion on the occupancy of CLOCK on E-box sites of the indicated genes. Data show the mean  $\pm$  SEM of triplicate experiment. For each gene, signals were normalized to the highest value among the six measurements (triplicate control and triplicate TRAP150 depletion). Data are representative of three independent experiments. ChIP assays for CLOCK typically had lower signals and higher variability than those for BMAL1 shown in Fig. 4.

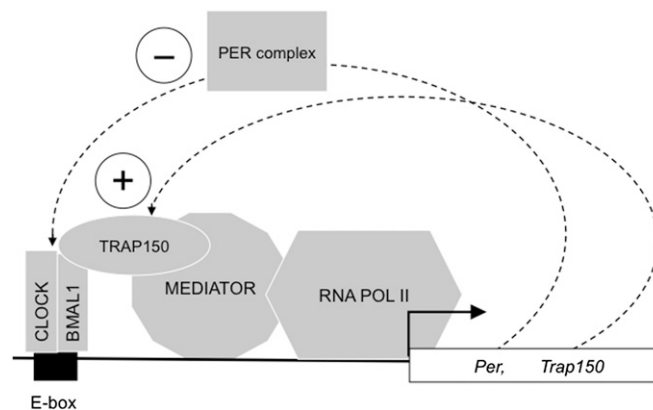

**Fig. S6.** Model of the role of TRAP150 in the core circadian clock feedback loop. Diagram depicts a CLOCK-BMAL1-TRAP150 complex (at the peak of the TRAP150 circadian oscillation) bound to an E-box site upstream of the *Per* genes and to an E-box site upstream of the *Trap150* gene. Dashed curves: +, positive feedback loop; −, negative feedback loop. Negative feedback action of the PER complex is delayed by  $\sim 4$ –6 h with respect to the peak action of TRAP150. RNA Pol II, RNA polymerase II preinitiation complex. Arrow denotes start site of transcription. It is possible that the interaction between TRAP150 and CLOCK-BMAL1 is indirect. The protein–protein associations likely involve looping of the underlying DNA.



**Table S3. Primer sequences for pre-mRNA analysis**

| Gene                  | Sequence                       |
|-----------------------|--------------------------------|
| <i>Per1</i>           |                                |
| Forward primer        | GAGCAGCCATCCTGAACCTAA          |
| Reverse primer        | GACTCCCGAGTGTGAGCAA            |
| Probe                 | AGACCTTTAGCGAACACGACCCCTTACAC  |
| <i>Per2</i>           |                                |
| Forward primer        | TCAGGCACTCCAGGCAAGTC           |
| Reverse primer        | GACATCACACCAGAGATTTTAAAGAAAA   |
| Probe                 | TTGTCCCAAAGCCACCACCCAGC        |
| <i>Cry1</i>           |                                |
| Forward primer        | TGTGTCTAGGTAACATCATAGTGTGGAGAA |
| Reverse primer        | TGCTTTTCCTCCTAACCTCAA          |
| Probe                 | CGGGCTCCGGATCCAGCTTCT          |
| <i>Cry2</i>           |                                |
| Forward primer        | CTCTCCCCACGCCTCTT              |
| Reverse primer        | CTGATCACCACCAGTTTGTCT          |
| Probe                 | TCCCATCCCGGTAAACCTCTCTTCA      |
| <i>Bhlhe40 (Dec1)</i> |                                |
| Forward primer        | TGTGTGCTGTGATCCCTTCAAG         |
| Reverse primer        | CAGAGATGCCCAAGTTGAGA           |
| Probe                 | CTCCACTCTAACCTTGTGTCCGCGA      |
| <i>Bhlhe41 (Dec2)</i> |                                |
| Forward primer        | CTGGATAGTTAATTAGGGCCATTGA      |
| Reverse primer        | GGAAAGCTCAGGGCTGGAAT           |
| Probe                 | TCGCAAGGAACTCTGCCGCA           |
| <i>Rps27</i>          |                                |
| Forward primer        | TGGTCCAGGTTTCGACAGAGA          |
| Reverse primer        | CCCGCAATTAGCGCAAGA             |
| Probe                 | CTCGCTTTGGGTCCGCACGG           |
| <i>Rps20</i>          |                                |
| Forward primer        | CGCCAAGGAAAAGAATCTGAA          |
| Reverse primer        | CTCGAGTCTACCTGTCCCTTACCT       |
| Probe                 | AGGACCGGTGCGCATGCCTACC         |
| <i>Rps13</i>          |                                |
| Forward primer        | TCTGGCAAGCTCACAGTGATG          |
| Reverse primer        | AACCCAACATGGAAAGTCCTTCT        |
| Probe                 | TGGTGTTCACATTTCGAGTTTCCA       |
| <i>Rpl30</i>          |                                |
| Forward primer        | GAATCCGAGAGGCTCTTTGTATG        |
| Reverse primer        | GTCATCTAAAACAACTCAGTTCCA       |
| Probe                 | TTCAGACATCATGAAAGGGTTCAGTTCCA  |
| <i>Oaz1</i>           |                                |
| Forward primer        | GGGCCACAGTGCTGAGATG            |
| Reverse primer        | CACTGCCCTCACCTGTGT             |
| Probe                 | CACTGCCTGTGAGGCCTGTCTTGC       |
